# Supplementary material for: Prevalence of Parent-Reported Food Allergy in a Mexican Pre-School Population
Source: MDPI journal article supplement (doi:10.3390/jcm12155095), 2023-08-03
Supplement: s1 [file s1]

## Food Allergy Prevalence in Mexican Preschoolers Estimated by Parent-Report

### Supplementary Materials

**Table S1.** Prevalence estimations by type of sex

| Assessment                   | Number of reported cases | Prevalence % (95% CI) |                    | p       |
|------------------------------|--------------------------|-----------------------|--------------------|---------|
|                              |                          | Male=422              | Female=547         |         |
| Adverse food reactions       | 60                       | 7.97 (5.61–10.91)     | 6.73 (4.40–9.78)   | 0.5905  |
| Perceived FA, ever           | 93                       | 12.52 (9.57–15.99)    | 10.24 (7.35–13.79) | 0.3217  |
| Physician-diagnosed FA, ever | 43                       | 5.92 (3.90–8.55)      | 4.58 (2.69–7.23)   | 0.4345  |
| Immediate-type FA, ever      | 24                       | 2.73 (1.42–4.72)      | 3.23 (1.68–5.58)   | 0.6836  |
| Immediate-type FA, current   | 13                       | 1.59 (0.64–3.25)      | 1.61 (0.59–3.48)   | >0.9999 |
| Food-induced anaphylaxis     | 9                        | 1.13 (0.37–2.63)      | 1.07 (0.29–2.73)   | >0.9999 |

**Table S2.** Prevalence estimations by type of preschool

| Assessment                   | Number of reported cases | Prevalence % (95% CI) |                     | p      |
|------------------------------|--------------------------|-----------------------|---------------------|--------|
|                              |                          | Public=628            | Private=182         |        |
| Adverse food reactions       | 60                       | 7.32 (5.41–9.65)      | 7.69 (4.26–12.57)   | 0.8726 |
| Perceived FA, ever           | 93                       | 10.35 (8.08–13.00)    | 15.38 (10.47–21.46) | 0.0652 |
| Physician-diagnosed FA, ever | 43                       | 4.93 (3.37–6.93)      | 6.59 (3.45–11.23)   | 0.3544 |
| Immediate-type FA, ever      | 24                       | 3.18 (1.95–4.87)      | 2.19 (0.60–5.53)    | 0.6239 |
| Immediate-type FA, current   | 13                       | 1.75 (0.87–3.11)      | 1.09 (1.13–3.91)    | 0.7433 |
| Food-induced anaphylaxis     | 9                        | 1.27 (0.55–2.49)      | 0.54 (0.01–3.02)    | 0.6922 |

**Table S3.** Association between other allergic diseases diagnosis and immediate-type food allergy development.

| Allergic disease           | Immediate-type<br>FA, ever (n=24)<br>n (%) | Non-FA<br>(n=786)<br>n (%) | p       | Odds Ratio<br>(95% CI)  |
|----------------------------|--------------------------------------------|----------------------------|---------|-------------------------|
| Asthma                     | 4 (16.66)                                  | 57 (7.25)                  | 0.0991  | 2.558<br>(0.9166–7.560) |
| Chronic urticaria          | 10 (41.66)                                 | 42 (5.34)                  | <0.0001 | 12.65<br>(5.262–30.24)  |
| Allergic rhinitis          | 15 (62.5)                                  | 128 (16.28)                | <0.0001 | 7.774<br>(3.532–17.02)  |
| Anaphylaxis                | –                                          | 2 (0.25)                   | >0.9999 | –                       |
| Atopic dermatitis          | 12 (50.00)                                 | 104 (13.23)                | <0.0001 | 6.558<br>(2.796–15.29)  |
| Insect sting allergy       | 8 (33.33)                                  | 54 (6.87)                  | 0.0002  | 6.778<br>(2.875–16.05)  |
| Animals allergy            | 7 (29.16)                                  | 34 (4.32)                  | <0.0001 | 9.107<br>(3.538–23.29)  |
| Allergic<br>conjunctivitis | 5 (20.83)                                  | 38 (4.83)                  | 0.0067  | 5.180<br>(2.016–14.51)  |
| Drug allergy               | 5 (20.83)                                  | 62 (7.88)                  | 0.0411  | 3.073<br>(1.216–8.219)  |

**Table S4.** Type of delivery and its association with the risk of immediate-type food allergy development.

| Allergic disease           | Caesarean section<br>(n=511)<br>n (%) | Vaginal birth<br>(n=299)<br>n (%) | p       | Odds Ratio<br>(95% CI)   |
|----------------------------|---------------------------------------|-----------------------------------|---------|--------------------------|
| Immediate-type FA,<br>ever | 15 (2.93)                             | 9 (3.01)                          | >0.9999 | 0.9745<br>(0.4434–2.337) |

**Table S5.** Feeding method during the first year of life and its association with the risk of immediate-type food allergy development.

| Allergic disease           | Non-exclusive<br>breastfeeding<br>(n=609)<br>n (%) | Exclusive<br>breastfeeding<br>(n=201)<br>n (%) | p       | Odds Ratio<br>(95% CI)   |
|----------------------------|----------------------------------------------------|------------------------------------------------|---------|--------------------------|
| Immediate-type FA,<br>ever | 16 (2.62)                                          | 8 (3.98)                                       | >0.3396 | 0.6509<br>(0.2906–1.461) |

**Table S6.** Association between Father's History of Allergic Diseases and Immediate-Type Food Allergy Development.

| Allergic disease           | Immediate-type<br>FA, ever (n=24)<br>n (%) | Non-FA<br>(n=786)<br>n (%) | p       | <i>Odds Ratio</i><br>(95% CI) |
|----------------------------|--------------------------------------------|----------------------------|---------|-------------------------------|
| Asthma                     | 3 (12.5)                                   | 27 (3.43)                  | 0.0549  | 4.016<br>(1.199–13.41)        |
| Food allergy               | 3 (12.5)                                   | 31 (3.94)                  | 0.0748  | 3.479<br>(1.046–11.38)        |
| Allergic rhinitis          | 10 (41.66)                                 | 93 (11.83)                 | 0.0003  | 5.323<br>(2.335–12.01)        |
| Anaphylaxis                | –                                          | 2 (0.25)                   | –       | –                             |
| Atopic dermatitis          | 6 (25.00)                                  | 41 (5.21)                  | 0.0017  | 6.057<br>(2.332–15.78)        |
| Insect sting allergy       | 5 (20.83)                                  | 16 (2.03)                  | 0.0077  | 5.04<br>(1.95 – 13.21)        |
| Animals allergy            | 6 (11.76)                                  | 17 (2.23)                  | 0.0002  | 12.66<br>(4.660–37.89)        |
| Allergic<br>conjunctivitis | 3 (12.5)                                   | 21 (2.67)                  | 0.0307  | 5.204<br>(1.533–18.22)        |
| Drug allergy               | 3 (4.16)                                   | 45 (5.72)                  | >0.9999 | 0.7159<br>(0.06764–4.060)     |

**Table S7.** Association between Mother's History of Allergic Diseases and Immediate-Type Food Allergy Development.

| Allergic disease        | Immediate-type<br>FA, ever (n=24)<br>n (%) | Non-FA<br>(n=786)<br>n (%) | p                 | Odds Ratio<br>(95% CI)  |
|-------------------------|--------------------------------------------|----------------------------|-------------------|-------------------------|
| Asthma                  | 2 (8.33)                                   | 30 (3.81)                  | 0.2442            | 2.291<br>(0.5110–9.507) |
| Food allergy            | 7 (29.16)                                  | 46 (5.85)                  | <b>0.0005</b>     | 6.624<br>(2.561–16.34)  |
| Allergic rhinitis       | 11 (45.83)                                 | 111 (14.12)                | <b>0.0003</b>     | 5.146<br>(2.339–11.66)  |
| Anaphylaxis             | –                                          | 1 (0.12)                   | –                 | –                       |
| Atopic dermatitis       | 7 (29.16)                                  | 55 (6.99)                  | <b>0.0013</b>     | 5.473<br>(2.104–13.29)  |
| Insect sting allergy    | 6 (25.00)                                  | 22 (2.79)                  | <b>&lt;0.0001</b> | 11.58<br>(4.181–29.95)  |
| Animals allergy         | 6 (25.00)                                  | 53 (6.74)                  | <b>0.0055</b>     | 4.610<br>(1.807–11.72)  |
| Allergic conjunctivitis | 4 (16.6)                                   | 24 (3.05)                  | <b>0.0075</b>     | 6.350<br>(2.196–18.83)  |
| Drug allergy            | 8 (33.33)                                  | 86 (10.94)                 | <b>0.0037</b>     | 4.070<br>(1.771–9.353)  |

**Table S8.** Association between Sibling's History of Allergic Diseases and Immediate-Type Food Allergy Development.

| Allergic disease        | Immediate-type<br>FA, ever (n=19)<br>n (%) | Non-FA<br>(n=652)<br>n (%) | p             | <i>Odds Ratio</i><br>(95% CI) |
|-------------------------|--------------------------------------------|----------------------------|---------------|-------------------------------|
| Asthma                  | 3 (15.78)                                  | 31 (4.75)                  | 0.066         | 3.756<br>(1.108–13.24)        |
| Food allergy            | 3 (15.78)                                  | 35 (5.36)                  | 0.0866        | 3.305<br>(0.9796–11.48)       |
| Allergic rhinitis       | 6 (31.57)                                  | 81 (12.42)                 | <b>0.0267</b> | 3.254<br>(1.228–8.259)        |
| Anaphylaxis             | –                                          | 1 (0.15)                   | –             | –                             |
| Atopic dermatitis       | 5 (26.31)                                  | 49 (7.51)                  | <b>0.0136</b> | 4.395<br>(1.679–12.03)        |
| Insect sting allergy    | 1 (5.26)                                   | 20 (3.06)                  | 0.458         | 1.756<br>(0.1602–11.53)       |
| Animals allergy         | 4 (21.05)                                  | 29 (4.44)                  | <b>0.0112</b> | 5.729<br>(1.956–17.93)        |
| Allergic conjunctivitis | –                                          | 14 (2.14)                  | –             | –                             |
| Drug allergy            | 3 (15.78)                                  | 49 (7.51)                  | 0.1765        | 2.307<br>(0.6913–7.755)       |
